# Supplementary material
Source: PubMed Central journal article supplement (PMC6085655)
Supplement: SC-006-C4SC01875C-s001.pdf [file SC-006-C4SC01875C-s001.pdf]

## Supporting Information

### Mechanistic Investigations Reveal that Dibromobimane Extrudes Sulfur from Biological Sulfhydryl Sources other than Hydrogen Sulfide

Leticia A. Montoya,<sup>1,a</sup> Xinggui Shen,<sup>2,a</sup> James J. McDermott,<sup>1</sup> Christopher G. Kevil,<sup>2,\*</sup> and Michael D. Pluth<sup>1,\*</sup>

<sup>1</sup> Department of Chemistry and Biochemistry, Institute of Molecular Biology, Materials Science Institute, University of Oregon, Eugene, OR 97403

<sup>2</sup> Department of Pathology, Louisiana State University Health Science Center, Shreveport, LA 71130

<sup>a</sup> These authors contributed equally to this work

Contact Information:

Michael D. Pluth  
pluth@uoregon.edu

Christopher G. Kevil  
CKevil@lsuhsc.edu

#### Table of Contents Page

|                                                                           |     |
|---------------------------------------------------------------------------|-----|
| 1. Experimental Details                                                   | S2  |
| 2. Kinetic trace of mBB and dBB reacting with H <sub>2</sub> S            | S6  |
| 3. Absorption and emission spectra of SdB and BTE                         | S7  |
| 4. Stability of BTE in acid                                               | S8  |
| 5. BTE Formation from Thiols                                              | S9  |
| 6. <sup>1</sup> H and <sup>13</sup> C{ <sup>1</sup> H} NMR spectra of BTE | S10 |
| 7. References                                                             | S11 |

## Experimental Details

### Materials and Methods

*General.* NMR spectra were acquired on a Varian INOVA 500 or Bruker 600 MHz spectrometer at 25 °C. Chemical shifts are reported in parts per million ( $\delta$ ) and are referenced to residual protic solvent resonances. Mass spectra were recorded with an Agilent LC/MS mass spectrometer using electrospray ionization in positive ion mode. Fluorescence spectra were obtained on a Photon Technology International (PTI) Quanta Master 40 spectrofluorimeter equipped with a Quantum Northwest TLC-50 temperature controller. UV–visible spectra were acquired on a Cary 100 spectrometer equipped with a Quantum Northwest TLC-42 dual cuvette temperature controller at  $25.00 \pm 0.05$  °C. Molar absorptivity and quantum yield data were acquired in 50 mM PIPES buffer with 100 mM KCl, pH 7.4, at 25 C in 1.0 cm path length cuvettes obtained from Starna Scientific.

Reagents were purchased from Aldrich or TCI, deuterated solvents were purchased from Cambridge Isotope Laboratories, and mBB and dBB were purchased from Echelon Biosciences. Piperazine-*N,N'*-bis(2-ethanesulfonic acid) (PIPES, Aldrich) and potassium chloride (99.999%, Aldrich) were used to make buffered solutions (50 mM PIPES, 100 mM KCl, pH 7.4) with Millipore water. Anhydrous sodium hydrosulfide (NaSH) was purchased from Strem Chemicals and handled under nitrogen. Silica gel (SiliaFlash F60, Silicycle, 230 - 400 mesh) was used for chromatography. Analytical thin-layer chromatography (TLC) was performed on J. T. Baker silica gel plates (250  $\mu$ m thickness) and preparative TLC was performed on Silicycle SiliaPlates (1 mm thickness). All compounds subjected to preparative chromatography were protected from ambient light during purification.

*Plasma collection and processing.* C57BL/6J male mice purchased from Jackson labs and CSE knockout mice bred in house were used for this study.<sup>1</sup> Mice were maintained at the association for assessment and accreditation of laboratory animal care international-accredited Louisiana State University Health Science Center-Shreveport animal resource facility and maintained in accordance with the National Research Council's guide for care and use of laboratory animals. All animal studies were approved by the institutional animal care and use committee (protocol P-12-011) and conformed to the guide for the care and use of laboratory animals published by the National Institutes of Health.

Mice were anesthetized by IP injection with 150 mg/kg ketamine and 10 mg/ kg xylazine. Blood was collected into plasma separator tubes from the retro-orbital plexus using heparinized plastic capillary tubes. Plasma samples were immediately placed in a stabilization buffer (degassed 100 mM Tris–HCl buffer, pH 9.5, 0.1 mM diethylenetriaminepentaacetic acid (DTPA)) to preserve bioavailable forms of H<sub>2</sub>S and metabolic proteins. Samples were snap-frozen and stored in liquid nitrogen until analyzed.

*SdB/BTE HPLC detection method.* After derivatization with excess mBB or dBB, concentrations of sulfide dibimane or bimane thioether were measured by Shimadzu Prominence ultra fast liquid chromatograph (HPLC 20A Prominence) equipped with fluorescence detection ( $\lambda_{\text{ex}} = 390 \text{ nm}$ ,  $\lambda_{\text{em}} = 475 \text{ nm}$  and  $\lambda_{\text{ex}} = 358 \text{ nm}$ ,  $\lambda_{\text{em}} = 484 \text{ nm}$ , respectively) and an eclipse XDB-C18 column (4.6×250 mm, 5  $\mu\text{m}$ ). Elution solvents were water containing 0.1% TFA (A) and acetonitrile containing 0.1% TFA (B). For the SdB assay, mobile phase composition (A/B; v/v) was 85:15 at 0 min, 65:35 at 5 min, 45:55 at 16 min, 30:70 at 23 min, 10:90 at 24 min, 10:90 at 26 min and 85:15 at 28 min (isocratic until 30 min). For the BTE assay, mobile phase composition (A/B; v/v) was 90:10 at 0 min, 65:35 at 5 min, 80:20 at 8 min, 40:60 at 16 min, 10:90 at 19 min, 10:90 at 21 min and 90:10 at 22 min (isocratic until 24 min). Both of flow rate were 0.6 mL/min and the injected volumes were 10  $\mu\text{L}$ .

*Preparation of calibration standards.* The analytical standards were prepared from synthetic and purified SdB.<sup>2</sup> Briefly, 10  $\mu\text{L}$  of 5, 10, 50, 100 and 200 nM SdB or 10  $\mu\text{L}$  of 6.25, 62.5, 125, 250, 500 and 1000 nM BTE were injected into the RP-HPLC. Plotting the peak area of SdB versus the concentration of SdB and performing a linear regression analysis obtained a concentration curve.

*General procedure for sulfide measurement.* Free and total sulfide of plasma samples were measured with monobromobimane (mBB) as previously described.<sup>1,2</sup> Briefly, blood was collected from mice by retro-orbital bleeding through heparinized plastic capillary tubes directly into BD microtainer plasma separator tubes (NO. 365958). Blood was centrifuged at 3,000 g for 2 min to obtain plasma. For free sulfide measurement, 30  $\mu\text{L}$  of plasma was reacted with 70  $\mu\text{L}$  of 100 mM Tris-HCl buffer (pH 9.5, 0.1 mM DTPA) and 50  $\mu\text{L}$  of 10 mM mBB at 1% oxygen in a hypoxic chamber at room temperature. The reaction was stopped after 30 minutes by adding 50  $\mu\text{L}$  of 200 mM 5-sulfosalicylic acid, and then the sulfide dibimane reaction product was analyzed by a RP-HPLC with an Eclipse XDB-C18 column and fluorescence detection ( $\lambda_{\text{ex}} = 390 \text{ nm}$ ,  $\lambda_{\text{em}}$

= 475 nm). For total sulfide measurement, total sulfide is released from 50  $\mu\text{L}$  of plasma by incubating these plasma samples in an acidic solution (pH 2.6, 100 mM phosphate buffer, 0.1 mM DTPA, 1 mM TCEP) in an enclosed system. Volatilized sulfide is then trapped in 100 mM Tris-HCl (pH 9.5, 0.1 mM DTPA) and then reacted with mBB. Sulfide dibimane reaction products were measured by RP-HPLC. Similar to the mBB method, 10 mM of dBB was used to measure free and total sulfide of samples. The reaction product BTE was analyzed by a RP-HPLC with an Eclipse XDB-C18 column and fluorescence detection ( $\lambda_{\text{ex}} = 358 \text{ nm}$ ,  $\lambda_{\text{em}} = 484 \text{ nm}$ ).

*General procedure for SdB and BTE measurements from GSH.* A 30  $\mu\text{L}$  aliquot of 0, 5, 50, 500 and 5,000  $\mu\text{M}$  glutathione was added to 70  $\mu\text{L}$  of 100 mM Tris-HCl buffer (pH 9.5, 0.1 mM DTPA) and 50  $\mu\text{L}$  of a 10 mM mBB or dBB stock solution in a hypoxic chamber (1%  $\text{O}_2$ , room temperature). For mBB samples, 50  $\mu\text{L}$  of 200 mM 5-sulfosalicylic acid was added after 30 minutes incubation. Both mBB and dBB samples were analyzed by RP-HPLC to quantify the formed SdB and BTE, respectively.

*General procedure for NMR studies.* Stock solutions of dBB (100 mM) and the thiol of interest (40 mM) were prepared in  $\text{CD}_3\text{CN}$  in a glove box. A 500  $\mu\text{L}$  aliquot of the dBB stock solution was transferred to a septum-capped NMR tube and an initial  $^1\text{H}$  NMR spectrum was obtained. After acquisition of the initial spectrum, 500  $\mu\text{L}$  of the thiol stock solution was added to the NMR tube by syringe and additional NMR spectra were recorded at 1, 2, 4, and 24 hours.

## Synthesis

*Bimane thioether (BTE).* Sodium hydrogen sulfide (8.0 mg, 0.071 mmol) was dissolved in 5 mL of degassed PIPES buffer (pH 9.5) and added drop-wise to a solution of dibromobimane (50.0 mg, 0.071 mmol) in dry, degassed acetonitrile (5 mL). The reaction mixture was stirred under nitrogen overnight in the dark. Unreacted NaSH was removed by purging the reaction mixture with nitrogen for approximately 30 minutes. The resultant reaction mixture was diluted with 5 mL of PIPES buffer and extracted with EtOAc (2 x 40 mL) and  $\text{CH}_2\text{Cl}_2$  (2 x 40 mL). The combined organic layers were dried with  $\text{MgSO}_4$  and the solvent was removed under vacuum to afford the crude product, which was purified by  $\text{SiO}_2$  chromatography (9:1  $\text{CH}_2\text{Cl}_2$ :MeOH) to yield the product as a yellow solid (30.7 mg, 97% yield).  $^1\text{H}$  NMR (300 MHz,  $\text{CD}_3\text{CN}$ )  $\delta$ : 3.85 (s, 4H), 1.81 (s, 6H, Me).  $^{13}\text{C}\{^1\text{H}\}$  NMR (125 MHz,  $\text{CD}_2\text{Cl}_2$ )  $\delta$ : 161.27, 150.44, 111.49, 23.19, 6.50. Calcd m/z for  $[\text{M}+\text{H}^+]$ : 223.0541, obs. 223.0547.

*Sulfide dibimane (SdB)*. The SdB product was prepared by modification of the published procedure.<sup>2</sup> Sodium hydrogen sulfide (5.6 mg, 0.099 mmol) was dissolved in 5 mL of degassed PIPES buffer (pH 9.5) and added drop-wise to a solution of monobromobimane (50.0 mg, 0.184 mmol) in dry, degassed acetonitrile (2.5 mL). The reaction mixture was stirred under nitrogen for 1 hour in the dark. The crude reaction mixture was diluted with 5 mL of PIPES buffer and extracted with EtOAc (1 x 50 mL) and CH<sub>2</sub>Cl<sub>2</sub> (1 x 40 mL). The combined organic layers were dried over MgSO<sub>4</sub> and the solvent was removed under vacuum to afford a yellow solid (26.1 mg, 69% yield). <sup>1</sup>H NMR (300 MHz, CD<sub>3</sub>CN) δ: 3.93 (s, 4H), 2.38 (s, 6H, Me), 1.86 (s, 6H, Me), 1.79 (s, 6H, Me), which matched the previously-reported spectrum.<sup>2</sup>

## Kinetic trace of mBB and dBB reacting with H<sub>2</sub>S

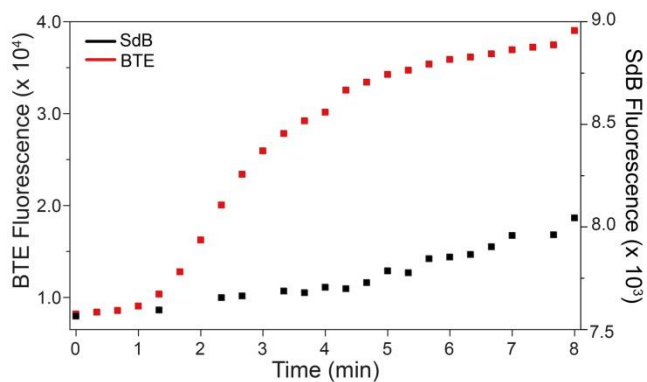

**Figure S1.** Comparison of the reaction rate of mBB and dBB with H<sub>2</sub>S. dBB reacts with H<sub>2</sub>S more quickly than mBB. The photophysical properties of BTE make it inherently more emissive than SdB. Conditions: pH 9.5, 50 mM PIPES buffer, 100 mM KCl, 25 °C, 3.3 mM mBB or dBB, 3.3 μM NaSH.

## Absorption and emission spectra of SdB and BTE

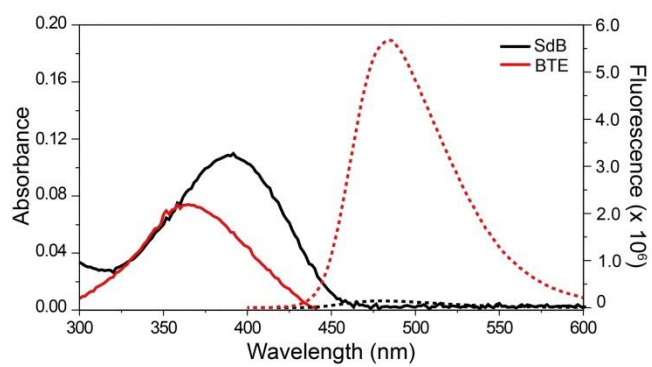

**Figure S2.** Comparison of the absorption (solid line) and emission profiles (dotted line) of SdB (black) and BTE (red). Conditions: pH 7.4, 50 mM PIPES buffer, 100 mM KCl, 25 °C.

### Stability of BTE in acid

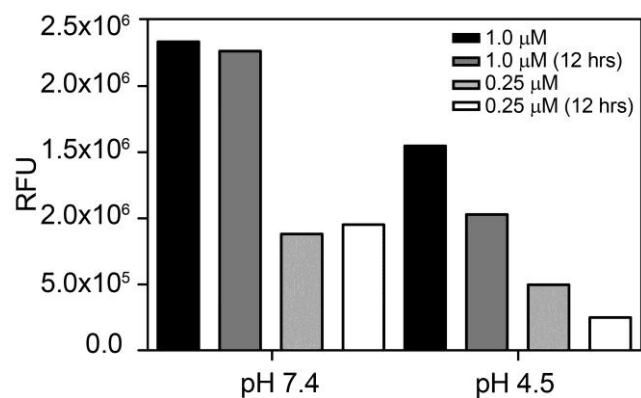

**Figure S3.** Stability of BTE at pH 7.4 and pH 4.5 after 12 h in buffer. The BTE product was quantified by HPLC.



## BTE Formation from Thiols

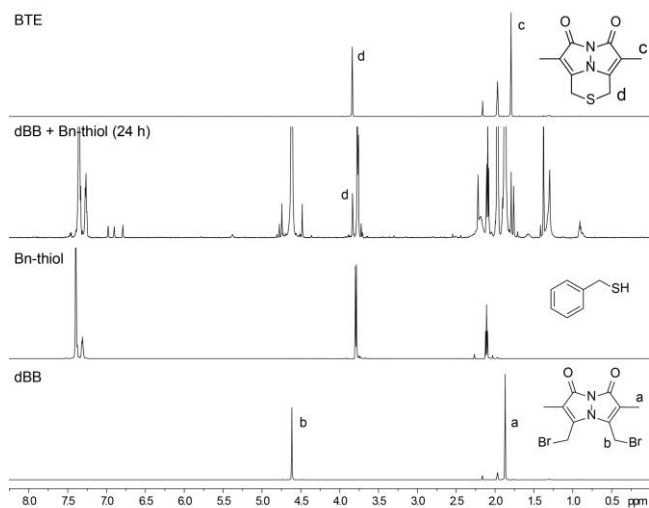

**Figure S4.** <sup>1</sup>H NMR spectra of the reaction of dBB (50 mM) with benzylthiol (20 mM) in CD<sub>3</sub>CN. Growth of a new peak (\*) at 3.8 ppm corresponds to the BTE product.

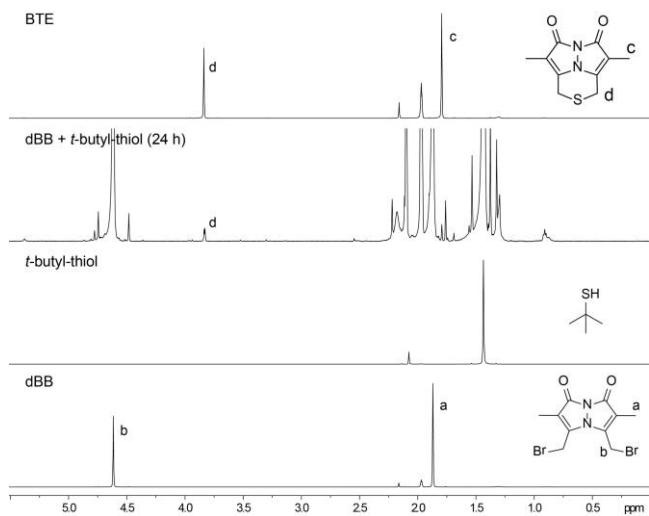

**Figure S5.** <sup>1</sup>H NMR spectra of the reaction of dBB (50 mM) with *tert*-butylthiol (20 mM) in CD<sub>3</sub>CN. Growth of a new peak (\*) at 3.8 ppm corresponds to the BTE product.

## NMR Spectra

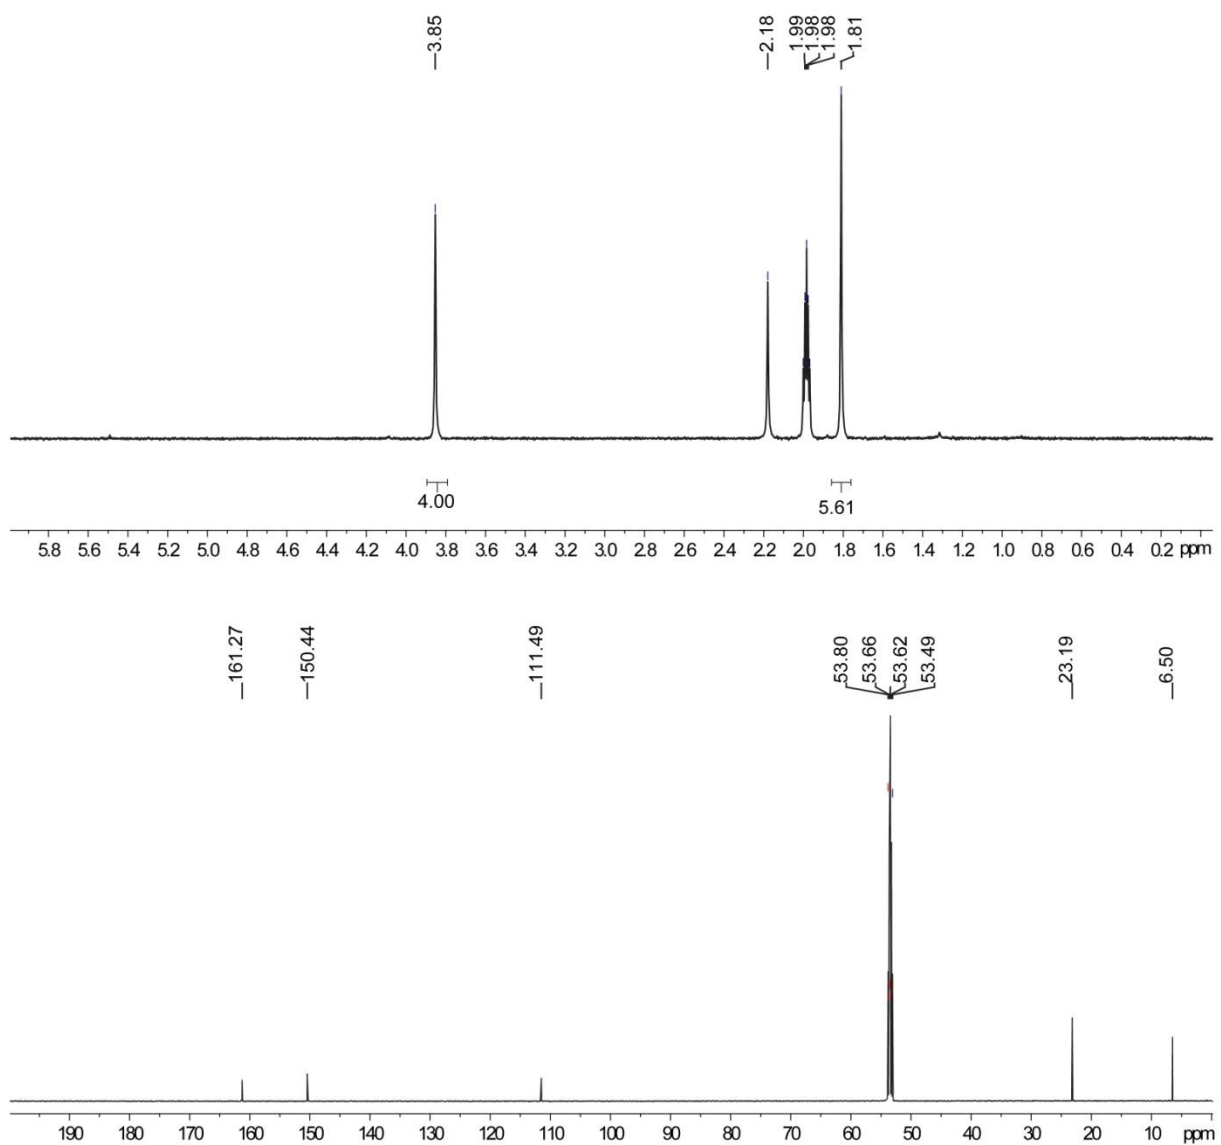

**Figure S6.**  $^1\text{H}$  (300 MHz, MeCN) and  $^{13}\text{C}\{^1\text{H}\}$  (125 MHz,  $\text{CD}_2\text{Cl}_2$ ) NMR spectra of BTE.

## References

1. X. G. Shen, E. A. Peter, S. Bir, R. Wang and C. G. Kevil, *Free Radical Biol. Med.*, 2012, **52**, 2276-2283.
2. X. G. Shen, C. B. Pattillo, S. Pardue, S. C. Bir, R. Wang and C. G. Kevil, *Free Radical Biol. Med.*, 2011, **50**, 1021-1031.
